# Supplementary material for: Blind source separation of molecular components of the human skinin vivo: non-negative matrix factorization of Raman microspectroscopy data
Source: Royal Society of Chemistry journal article supplement (doi:10.1039/d0an02480e), 2021-01-01
Supplement: d0an02480e1.pdf [file d0an02480e1.pdf]

## *Supplementary information*

# **Blind source separation of molecular components of the human skin in vivo: non-negative matrix factorization of Raman microspectroscopy data**

## **Authors**

B.P. Yakimov<sup>a,b†</sup>, A.V. Venets<sup>a†</sup>, J Schleusener<sup>c</sup>, V.V. Fadeev<sup>a</sup>, J. Lademann<sup>c</sup>, E.A. Shirshin<sup>\*a, b, d</sup> & M.E. Darvin<sup>\*c</sup>

<sup>a</sup>M.V. Lomonosov Moscow State University, Faculty of physics, 1-2 Leninskie Gory, Moscow, 119991, Russia.

<sup>b</sup>Medical Research and Education Center, M.V. Lomonosov Moscow State University, Lomonosovsky Prospect 27/10, Moscow, Russia, 119991

<sup>c</sup>Charité – Universitätsmedizin Berlin, corporate member of Freie Universität Berlin and Humboldt-Universität zu Berlin, Department of Dermatology, Venerology and Allergology, Center of Experimental and Applied Cutaneous Physiology, Charitéplatz 1, Berlin, 10117, Germany

<sup>d</sup>Institute for Regenerative Medicine, Sechenov First Moscow State Medical University, Trubetskaya 8-2, Moscow, 119991, Russia

\*E.S.: shirshin@lid.phys.msu.ru, M.D.: maxim.darvin@charite.de

†Authors contributed equally

\*E.S.: [shirshin@lid.phys.msu.ru](mailto:shirshin@lid.phys.msu.ru), M. D.: [maxim.darvin@charite.de](mailto:maxim.darvin@charite.de)

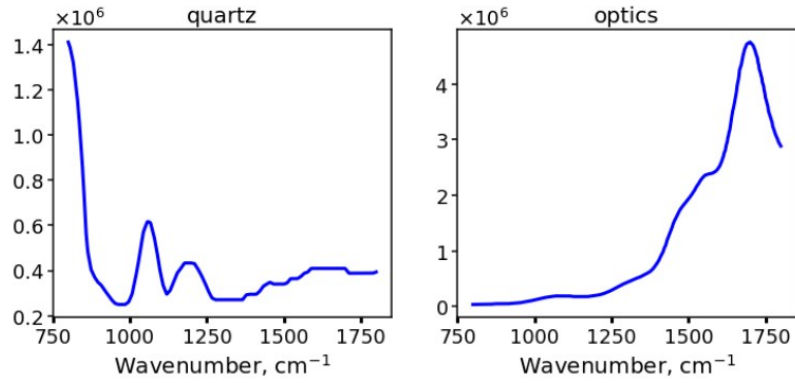

**Figure S1.** Spectra of residual instrument optics used in the SkinTools 2.0 software.

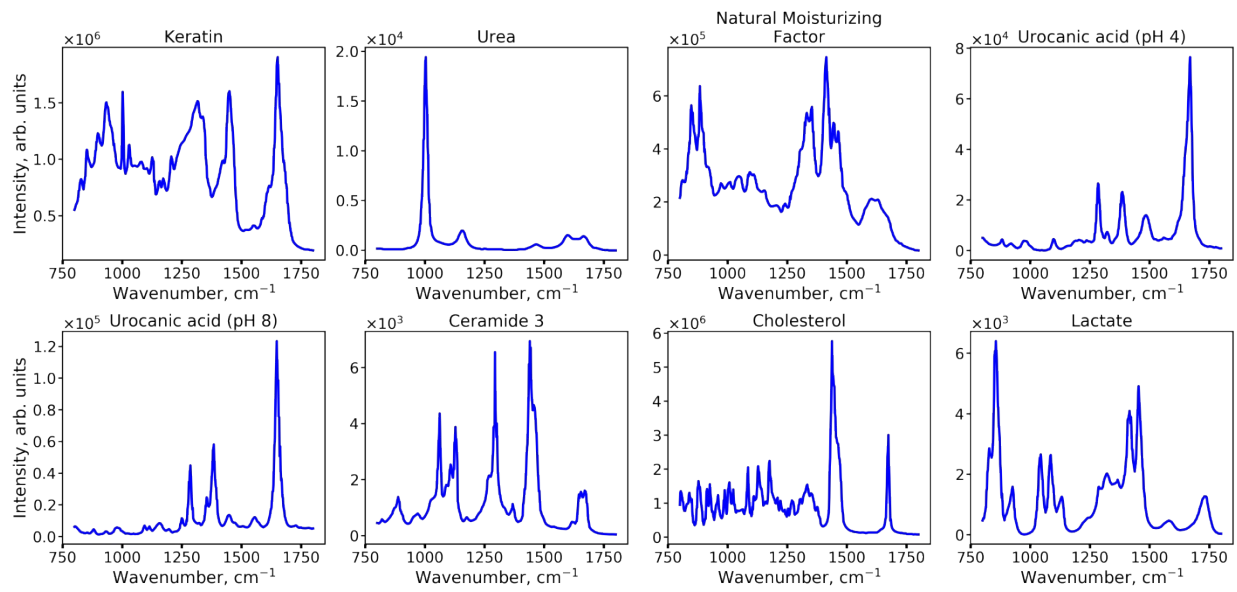

**Figure S2.** Spectra of individual basic components used for the Raman spectra modeling.

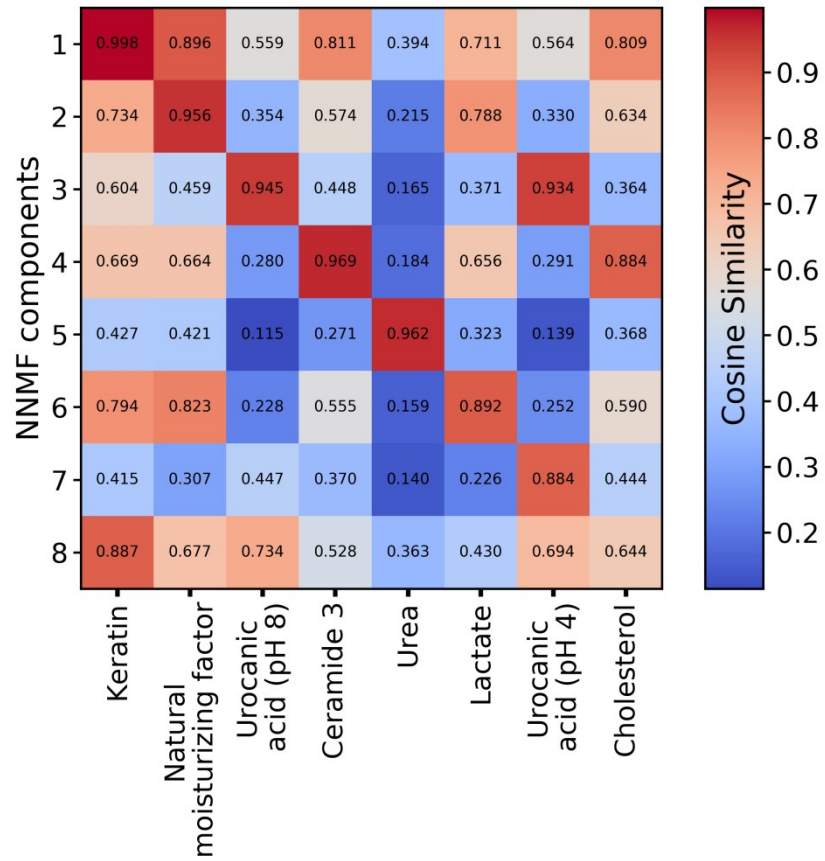

**Figure S3.** The matrix of pairwise cosine similarities between NMF-restored components and input basic spectra

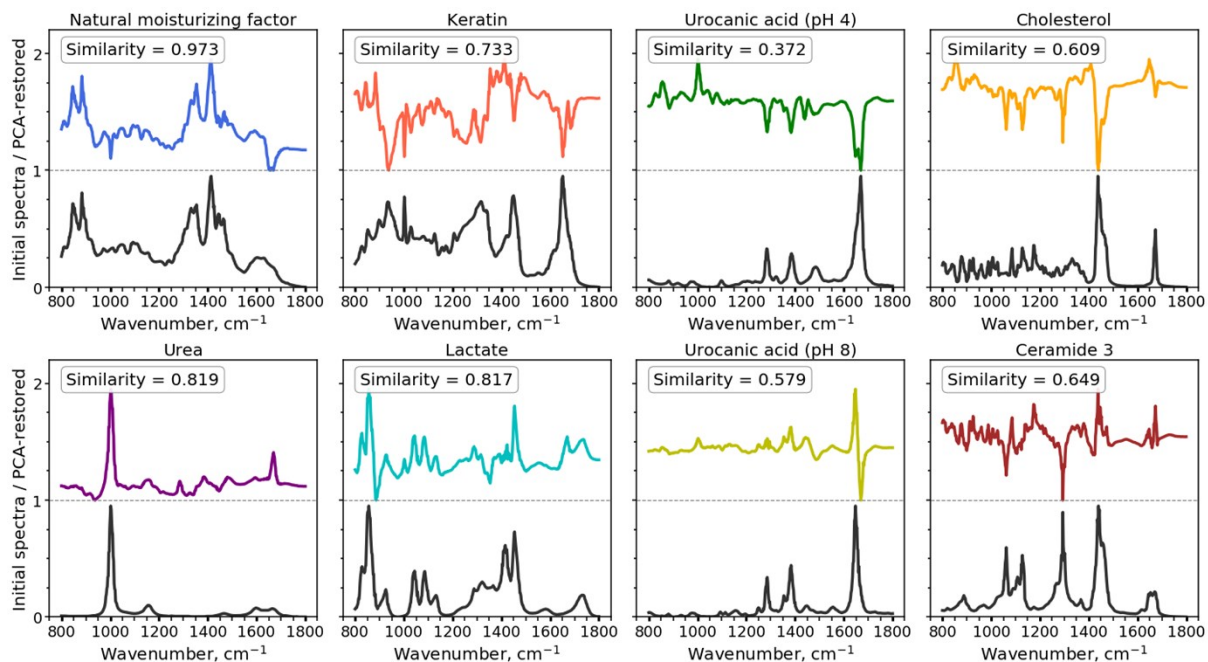

**Figure S4.** Spectra of the components used for the modeling of the dataset (black) and reconstructed principal components (coloured). The cosine measure of the similarity between the input and restored principal components is shown in the inset.

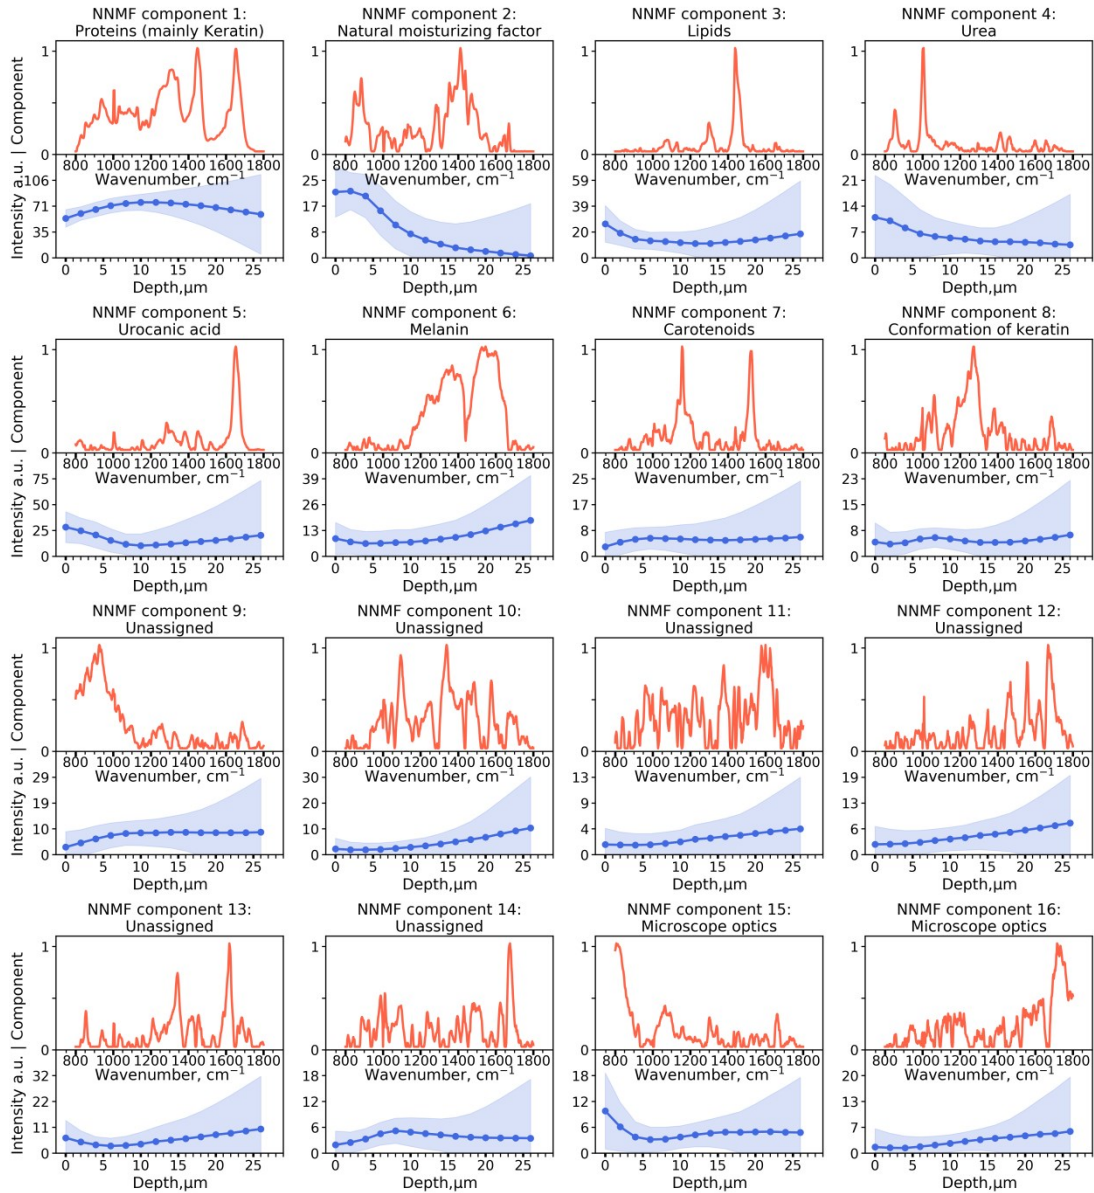

**Figure S5.** Spectra (top panels) and depth profiles of components (bottom panels) extracted using the NNMF algorithm applied to the experimentally observed depth-resolved skin spectra. Component profiles are averaged over measurements of 19 volunteers. The light-blue corridor represents the standard deviation of the values from the mean (solid blue line).

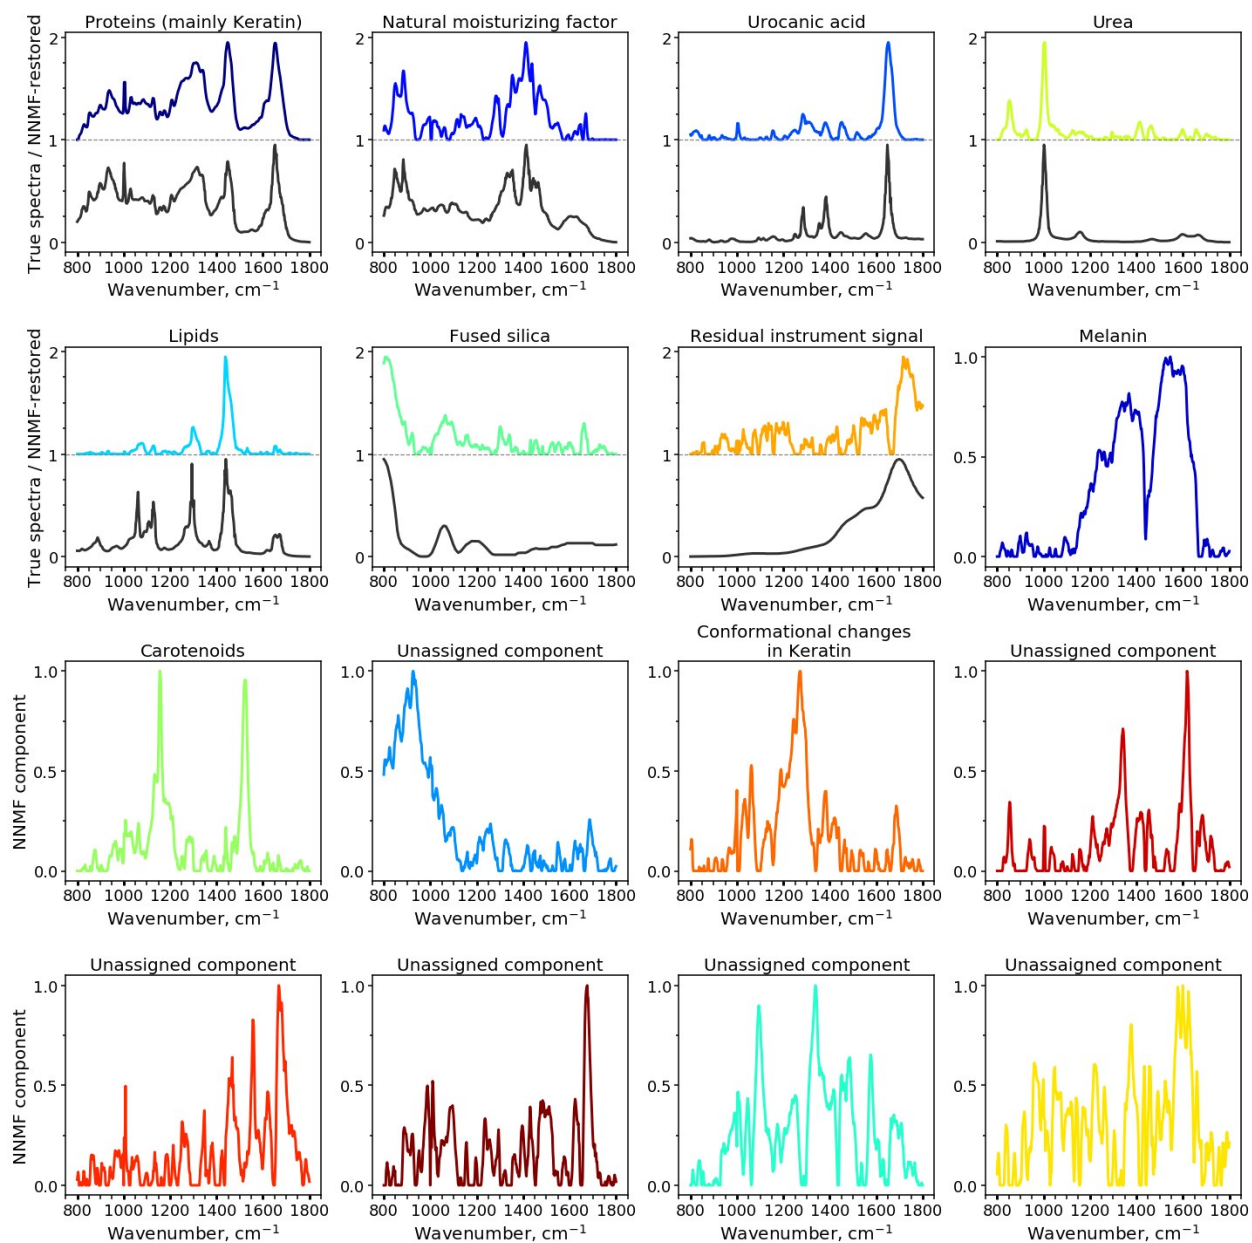

**Figure S6.** The spectra of all NMF-restored components for the experimental Raman spectra of the skin.

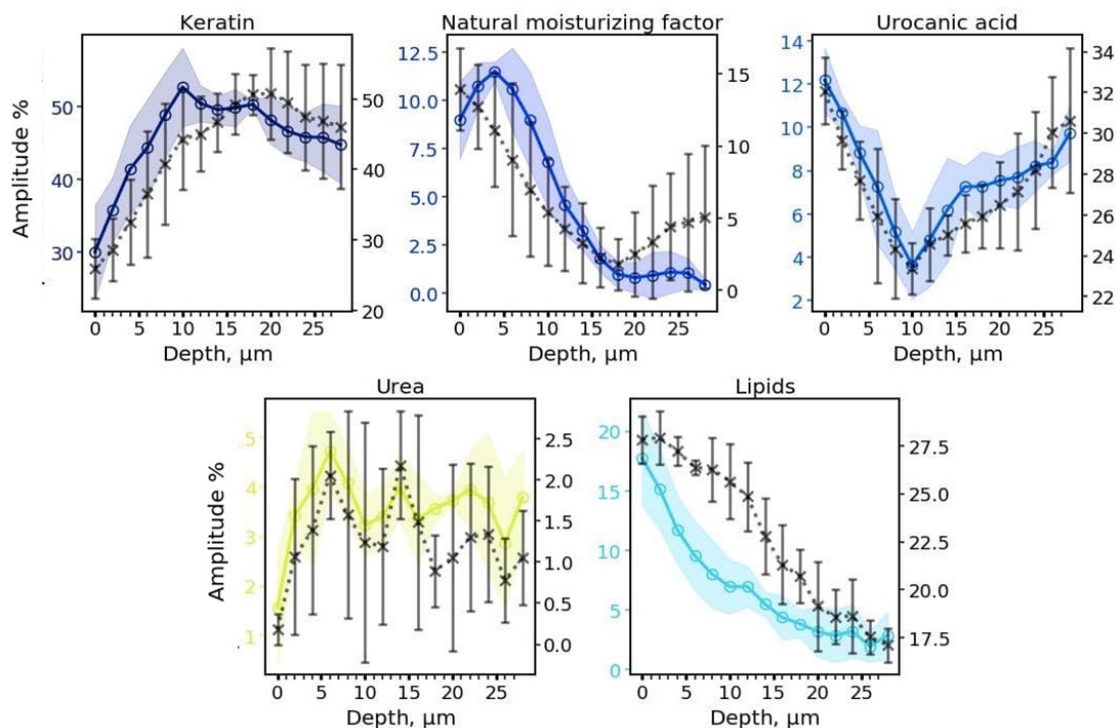

**Figure S7.** Average depth profiles of individual skin component amplitudes one volunteer (skin type II), obtained by NNMF (solid coloured lines) and by the decomposition with predefined components (dashed black lines) of the experimentally obtained depth-resolved Raman spectra.

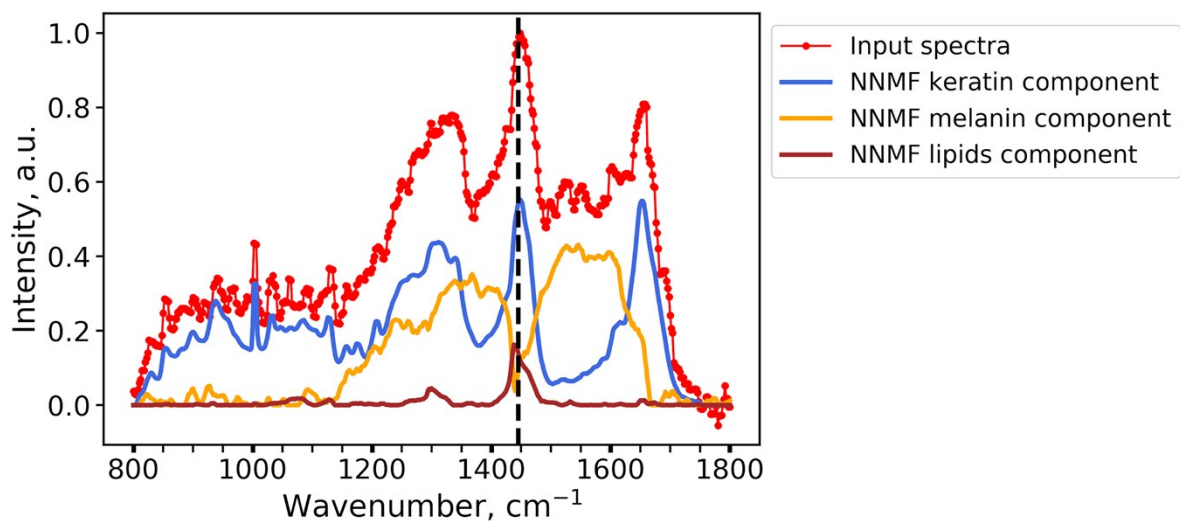

**Figure S8.** Normalized input Raman spectrum and spectra of the NNMF components related to keratin, melanin and lipids.

**Table S1.** The positions, full width at the half maximum (FWHM) and relative intensities of the bands of the input basic spectra and best-matched NNMF components obtained for modeled depth-resolved Raman spectra of the skin. For the FWHM calculation linear baseline subtraction was applied in the spectrum region specified in the Table. The bands are stated with relative intensity.

| Component name                       | Band centerline, cm <sup>-1</sup> |      | FWHM, cm <sup>-1</sup> |      | Relative intensity |              | Baseline subtraction region, cm <sup>-1</sup> |           |
|--------------------------------------|-----------------------------------|------|------------------------|------|--------------------|--------------|-----------------------------------------------|-----------|
|                                      | Input                             | NNMF | Input                  | NNMF | Component          | NNMF         | Component                                     | NNMF      |
| Keratin / NNMF-1                     | 852                               |      | 14                     |      | 0.164              | 0.171        | 838–872                                       | 838–872   |
|                                      | 934                               |      | 34                     | 36   | 0.27               | 0.246        | 914–994                                       | 914–984   |
|                                      | 1002                              |      | 6                      |      | 0.422              | 0.457        | 994–1014                                      | 984–1016  |
|                                      | 1126                              | 1128 | 12                     |      | <b>0.138</b>       | <b>0.18</b>  | 1114–1142                                     | 1114–1144 |
|                                      | 1316                              | 1294 | 80                     | 86   | 0.465              | 0.463        | 1218–1376                                     | 1218–1378 |
|                                      | 1450                              | 1444 | 36                     |      | <b>0.68</b>        | <b>0.773</b> | 1376–1508                                     | 1378–1510 |
|                                      | 1652                              | 1652 | 34                     | 36   | 1                  | 1            | 1508–1792                                     | 1510–1792 |
| Natural moisturizing factor / NNMF-2 | 846                               |      | 20                     | 14   | <b>0.602</b>       | <b>0.498</b> | 820–872                                       | 824–862   |
|                                      | 884                               |      | 12                     |      | <b>0.68</b>        | <b>0.752</b> | 872–912                                       | 862–912   |
|                                      | 1354                              |      | 60                     | 38   | <b>0.742</b>       | <b>0.65</b>  | 1224–1380                                     | 1294–1372 |
|                                      | 1414                              |      | 24                     |      | 1                  | 1            | 1380–1434                                     | 1372–1454 |
| Urocanic acid (pH 8) / NNMF-3        | 1286                              |      | 12                     |      | <b>0.323</b>       | <b>0.44</b>  | 1262–1330                                     | 1262–1334 |
|                                      | 1384                              |      | 18                     | 20   | 0.437              | 0.472        | 1330–1420                                     | 1331–1438 |
|                                      | 1648                              |      | 22                     | 36   | 1                  | 1            | 1592–1708                                     | 1592–1726 |
| Ceramide 3 / NNMF-4                  | 1062                              |      | 10                     |      | <b>0.474</b>       | <b>0.331</b> | 990–1076                                      | 1012–1074 |
|                                      | 1128                              |      | 12                     |      | 0.332              | 0.314        | 1118–1162                                     | 1118–1158 |
|                                      | 1294                              |      | 10                     | 6    | <b>0.732</b>       | <b>0.506</b> | 1276–1352                                     | 1278–1314 |
|                                      | 1440                              |      | 36                     |      | 1                  | 1            | 1390–1530                                     | 1396–1530 |
| Urea /                               | 1002                              |      | 16                     |      | 1                  | 1            | 868–1100                                      | 940–1064  |



|                                        |      |      |    |    |              |              |           |           |
|----------------------------------------|------|------|----|----|--------------|--------------|-----------|-----------|
| N                                      | 1156 |      | 38 | 36 | <b>0.104</b> | <b>0.091</b> | 1100–1226 | 1108–1206 |
| Lactate (pH4)<br>/<br>NNMF-6           | 856  |      | 24 |    | <b>1.866</b> | <b>1.507</b> | 806–892   | 802–886   |
|                                        | 926  | 930  | 20 | 44 | <b>0.413</b> | <b>0.769</b> | 892–974   | 886–1010  |
|                                        | 1044 |      | 18 | 28 | 0.658        | 0.703        | 974–1064  | 1010–1062 |
|                                        | 1086 | 1082 | 18 | 28 | 0.598        | 0.602        | 1064–1110 | 1062–1110 |
|                                        | 1416 |      | 20 | 28 | 0.712        | 0.77         | 1380–1438 | 1380–1438 |
|                                        | 1454 |      | 18 | 16 | 1            | 1            | 1438–1526 | 1438–1500 |
| Urocanic<br>acid (pH<br>4) /<br>NNMF-7 | 1386 | 1384 | 22 | 18 | <b>0.277</b> | <b>0.335</b> | 1342–1424 | 1364–1412 |
|                                        | 1670 | 1648 | 28 | 30 | 1            | 1            | 1578–1744 | 1576–1728 |
| Choleste<br>rol /<br>NNMF- 8           | 1438 | 1436 | 24 | 16 | <b>1.88</b>  | <b>0.176</b> | 1398–1582 | 1416–1456 |
|                                        | 1674 | 1670 | 12 | 18 | 1            | 1            | 1582–1780 | 1646–1730 |

**Table S2.** The positions and relative intensities of several bands of the spectra of multiple skin constituents (keratin, natural moisturizing factor, ceramide 3 and urocanic acid) and best-matched NNMF components obtained as a result of the decomposition of the experimental depth-resolved Raman spectra of skin.

| Component name                             | Band centerline, cm <sup>-1</sup> | Relative intensity |       |
|--------------------------------------------|-----------------------------------|--------------------|-------|
|                                            |                                   | Component          | NNMF  |
| Keratin<br>&<br>NNMF-1                     | 852                               | 0.519              | 0.278 |
|                                            | 934                               | 0.768              | 0.507 |
|                                            | 1002                              | 0.813              | 0.591 |
|                                            | 1126                              | 0.482              | 0.427 |
|                                            | 1316                              | 0.772              | 0.793 |
|                                            | 1450                              | 0.824              | 1     |
|                                            | 1652                              | 1                  | 0.993 |
| Natural moisturizing factor<br>&<br>NNMF-2 | 846                               | 0.752              | 0.579 |
|                                            | 884                               | 0.85               | 0.708 |
|                                            | 1354                              | 0.743              | 0.664 |
|                                            | 1414                              | 1                  | 1     |
| Ceramide 3<br>&<br>NNMF-3                  | 1062                              | 0.626              | 0.103 |
|                                            | 1128                              | 0.556              | 0.086 |
|                                            | 1294                              | 0.943              | 0.27  |
|                                            | 1440                              | 1                  | 1     |
| Urocanic acid<br>&<br>NNMF-4               | 1286                              | 0.357              | 0.263 |
|                                            | 1384                              | 0.465              | 0.176 |
|                                            | 1648                              | 1                  | 1     |

## Supplementary Note 1. Assessment of conformational changes of keratin by Amide I Raman band decomposition

To estimate the prevailing secondary structure of keratin ( $\alpha$ -helices or  $\beta$ -sheets) in the skin, Raman spectra deconvolution of the Amide I band located near  $1650\text{ cm}^{-1}$  was performed, as suggested in [1]. First, linear baseline corrections estimated by the  $1530\text{--}1540$  and  $1770\text{--}1780\text{ cm}^{-1}$  regions were applied to the raw Raman spectra. After that, the Raman signal in the  $1570\text{--}1720\text{ cm}^{-1}$  range was fitted using 4 Gaussian functions centered at  $1617\pm 7$ ,  $1655\pm 5$ ,  $1670\pm 5$  and  $1685\pm 5\text{ cm}^{-1}$  (the second number denotes the range in which position centers varied). The full width at half maximum (FWHM) for each peak varied in the  $13\text{--}33$ ,  $24\text{--}36$ ,  $8\text{--}22$  and  $30\text{--}44\text{ cm}^{-1}$  ranges, respectively. The Gaussian centered near  $1617\text{ cm}^{-1}$  corresponds to the signal from the tryptophan aromatic ring,  $1655\text{ cm}^{-1}$  to  $\alpha$ -helices,  $1670\text{ cm}^{-1}$  to  $\beta$ -sheets, and the band at  $1685\text{ cm}^{-1}$  corresponds to turns and random coils of skin proteins [1]. The depth profiles of the  $\beta$ -sheet/ $\alpha$ -helix keratin were calculated as the ratio between the sum of intensities of bands centered near  $1670$  and  $1685\text{ cm}^{-1}$  to the intensity of the Gaussian centered at  $1655\text{ cm}^{-1}$ . SI Figure 9 demonstrates the example deconvolution of Amide I band by the described procedure.

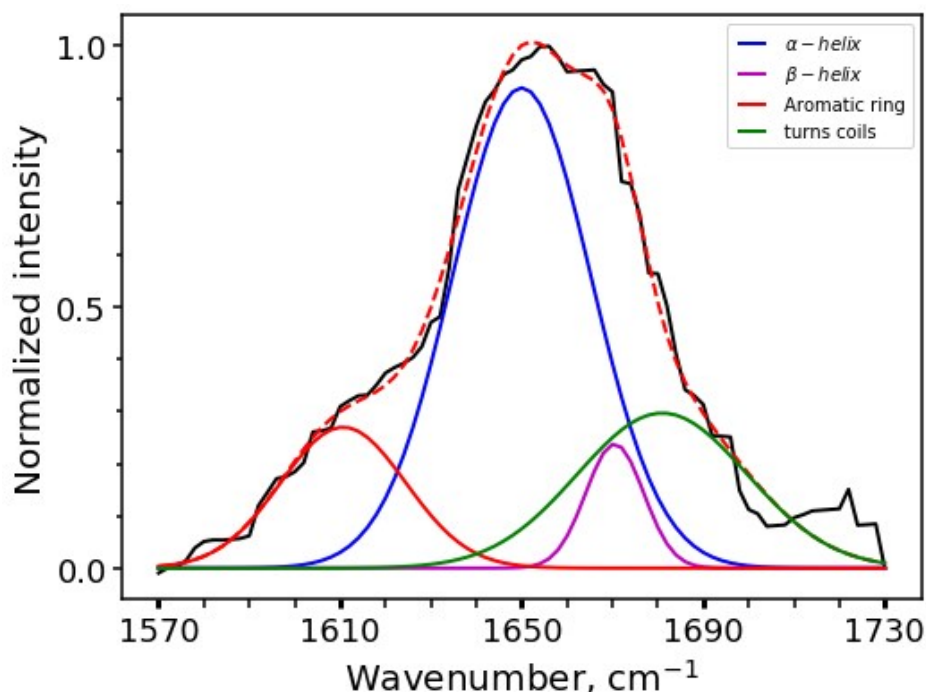

**Figure S9.** Example of Amide I band deconvolution by 4 Gaussians centered at  $1617$ ,  $1655$ ,  $1670$  and  $1685\text{ cm}^{-1}$ . The  $\beta$ -sheet/ $\alpha$ -helix ratio was estimated as sum intensities of the  $1670$  and  $1685\text{ cm}^{-1}$  bands to the intensity of the  $1655\text{ cm}^{-1}$  band.

### References

[1] Choe, ChunSik, et al. "Keratin-water-NMF interaction as a three layer model in the human stratum corneum using in vivo confocal Raman microscopy." *Scientific reports* 7.1 (2017): 1-13.
